# Supplementary material
Source: MDPI journal article supplement (https://www.mdpi.com/2227-9040/10/12/539)
Supplement: s1 [file s1 › chemosensors-2022032-supplementary.pdf]

Supplementary

# Nanoporous Ag-Decorated Ag<sub>7</sub>O<sub>8</sub>NO<sub>3</sub> Micro-Pyramids for Sensitive Surface-Enhanced Raman Scattering Detection

Linfan Guo <sup>1</sup>, Haibin Tang <sup>2</sup>, Xiujuan Wang <sup>3</sup>, Yupeng Yuan <sup>1</sup> and Chuhong Zhu <sup>1</sup>

<sup>1</sup> School of Chemistry and Chemical Engineering, School of Materials Science and Engineering, Anhui University, Hefei, 230601, China

<sup>2</sup> Key Laboratory of Materials Physics, Anhui Key Laboratory of Nanomaterials and Nanotechnology, Institute of Solid State Physics, HFIPS, Chinese Academy of Sciences, Hefei, 230031, China

<sup>3</sup> School of Microelectronics, Hefei University of Technology, Hefei, 230009, China

\* Correspondence: Email: chzhu@ahu.edu.cn or chzhu@issp.ac.cn

## S1. Estimation of enhancement factor

For estimation of the enhancement factor of the nanoporous Ag-decorated Ag<sub>7</sub>O<sub>8</sub>NO<sub>3</sub> micro-pyramids, 10  $\mu$ L (volume of the reference analyte solution, denoted as  $V_{\text{Ref}}$ ) of 10<sup>-2</sup> M (concentration of the reference analyte solution, denoted as  $C_{\text{Ref}}$ ) R6G ethanol solution was dispersed on a polyvinyl chloride film, and formed a spreading area of  $\pi$  mm<sup>2</sup> (surface area of the polyvinyl chloride film covered by analyte molecules, denoted as  $S_{\text{Ref}}$ ). The enhancement factor is calculated by comparing the ratios of R6G molecules on a nanoporous Ag-decorated Ag<sub>7</sub>O<sub>8</sub>NO<sub>3</sub> micro-pyramid (Curve I in Figure. S10) to the corresponding un-enhanced signals from a pure R6G on the polyvinyl chloride film (reference sample, Curve II in Figure. S10):

$$EF = \frac{I_{\text{SERS}}N_{\text{Ref}}}{I_{\text{Ref}}N_{\text{SERS}}} = \frac{I_{\text{SERS}}C_{\text{Ref}}V_{\text{Ref}}S_{\text{SERS}}}{I_{\text{Ref}}C_{\text{SERS}}V_{\text{SERS}}S_{\text{Ref}}} \quad (\text{S1})$$

where  $I_{\text{SERS}}$  and  $I_{\text{NRS}}$  are the Raman intensities of the spectra,  $N_{\text{SERS}}$  and  $N_{\text{Ref}}$  are the number of R6G molecules illuminated by the laser absorbed on the nanoporous Ag-decorated Ag<sub>7</sub>O<sub>8</sub>NO<sub>3</sub> micro-pyramid and in the reference sample, respectively. For the pure R6G on the polyvinyl chloride film with an area of  $\pi$  mm<sup>2</sup> ( $S_{\text{Ref}}$ ), considering the laser spot is a circle with a diameter of 5  $\mu$ m, the number of the R6G molecules illuminated by the laser ( $N_{\text{Ref}}$ ) is  $10^{-2} \times 10^{-5} \times 6.02 \times 10^{23} \times \pi(5\mu\text{m}/2)^2/\pi \text{ mm}^2 = 3.76 \times 10^{11}$ . For the estimation of  $N_{\text{SERS}}$  and  $I_{\text{SERS}}$ , 10  $\mu$ L (volume of the analyte solution used for SERS, denoted as  $V_{\text{SERS}}$ ) of a 10<sup>-11</sup> M (concentration of the analyte solution employed for SERS, denoted as  $C_{\text{SERS}}$ ) R6G ethanol solution was dispersed to 4 mm<sup>2</sup> (surface area of the SERS substrate covered by analyte molecules, denoted as  $S_{\text{SERS}}$ ) of the nanoporous Ag pyramids. Supposing that all R6G molecules are absorbed on the nanoporous Ag pyramids,  $N_{\text{SERS}}$  was estimated to be  $10^{-11} \times 10^{-5} \times 6.02 \times 10^{23} \times \pi(5\mu\text{m}/2)^2/4 \text{ mm}^2 = 295$ . For the band at 1648 cm<sup>-1</sup>,  $I_{\text{SERS}}/I_{\text{Ref}}$  was 0.44. Therefore, the enhancement factor for the band at 1648 cm<sup>-1</sup> is calculated to be  $5.6 \times 10^8$ .

## S2. Experimental

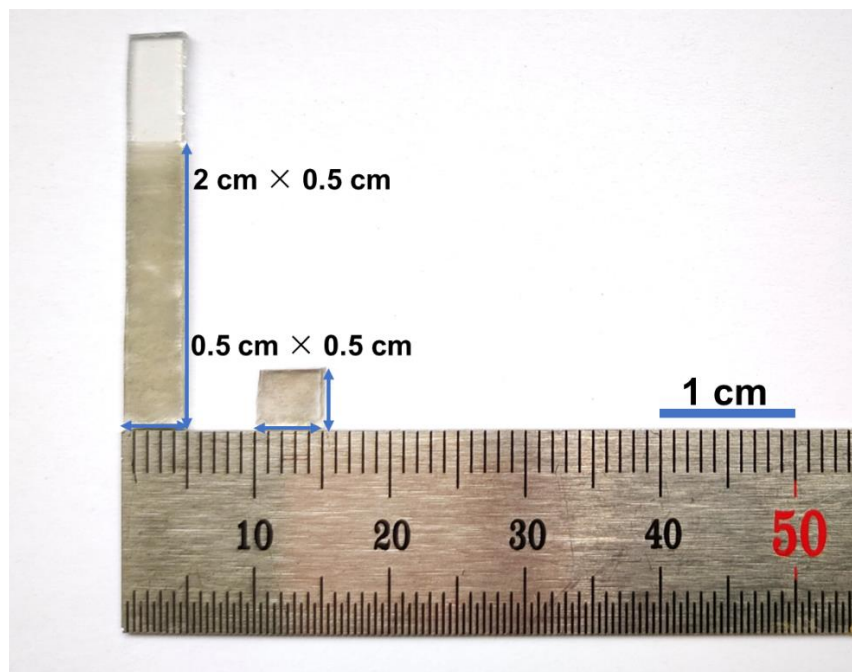

**Figure S1.** The fabricated nanoporous Ag-decorated  $\text{Ag}_7\text{O}_8\text{NO}_3$  micro-pyramids on ITO glass ( $2\text{ cm} \times 0.5\text{ cm}$ ) (left) and the actual substrate cut down for SERS detection ( $0.5\text{ cm} \times 0.5\text{ cm}$ ) (right).

## S3. Characteristics of $\text{Ag}_7\text{O}_8\text{NO}_3$ micro-pyramids

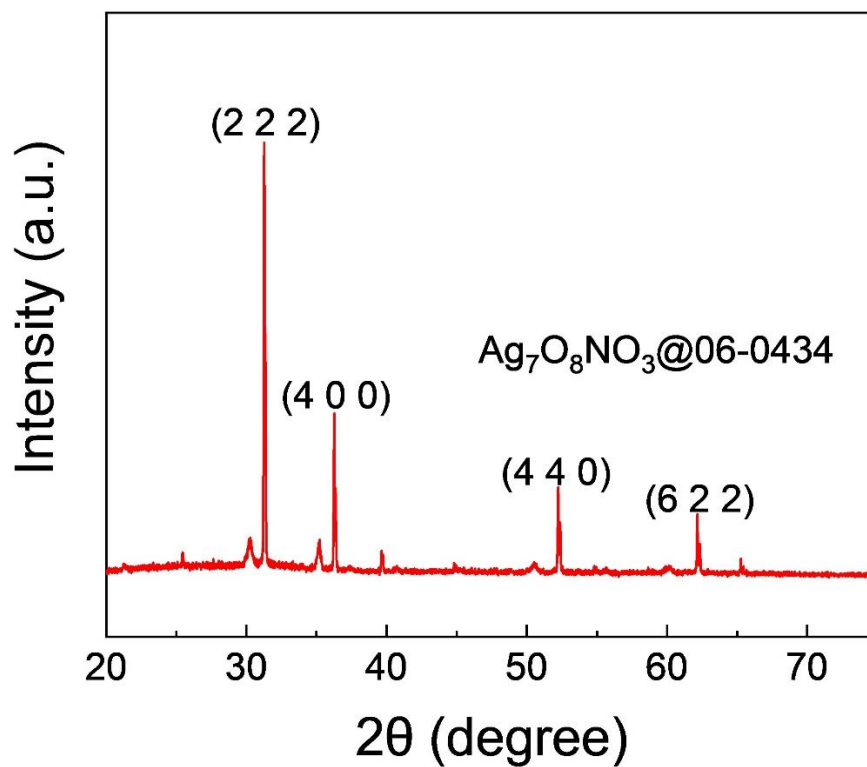

**Figure S2.** X-ray diffraction pattern of the electrodeposited materials achieved under electrodeposition voltage of 3 V and electrodeposition duration of 300 s.

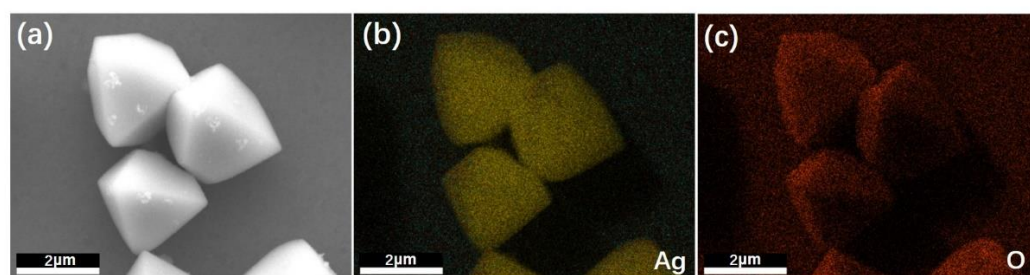

**Figure S3.** Energy-dispersive X-ray (EDX) mapping images of electrodeposited materials: (a) bright-field image; (b) Ag element mapping; (c) O element mapping.

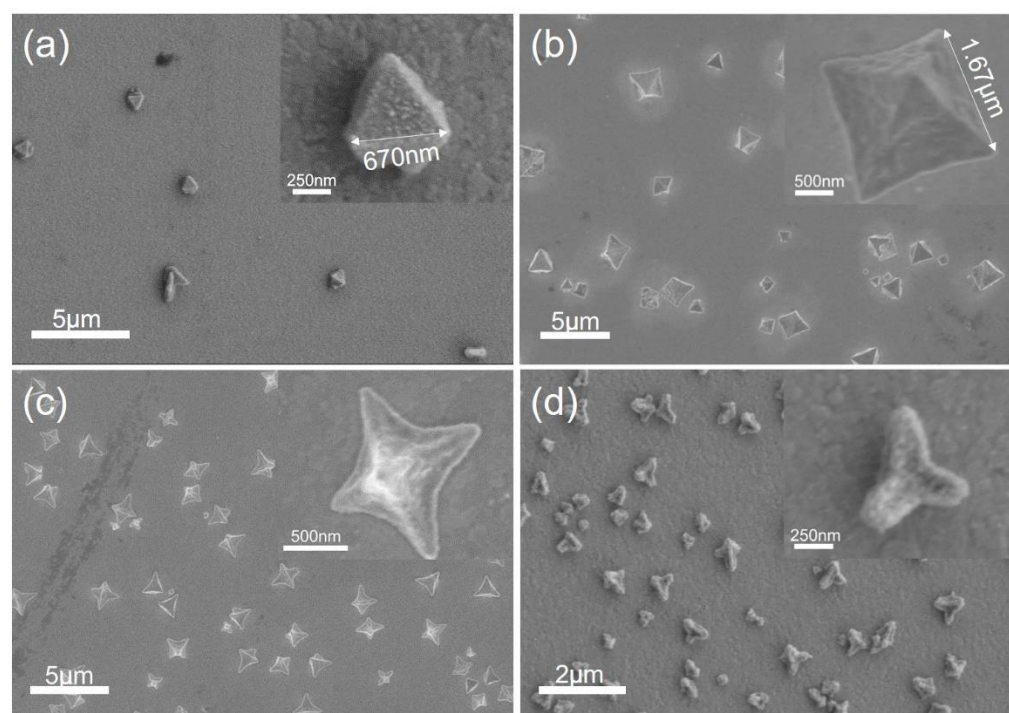

**Figure S4.** SEM images of the  $\text{Ag}_7\text{O}_8\text{NO}_3$  micro-pyramids' morphology evolution under the same electrodeposition time (10 s), while the electrodeposition voltage was increased from 1.5 V to 10 V: (a) 1.5 V; (b) 3 V; (c) 5 V; (d) 10 V. The insets are magnified images.

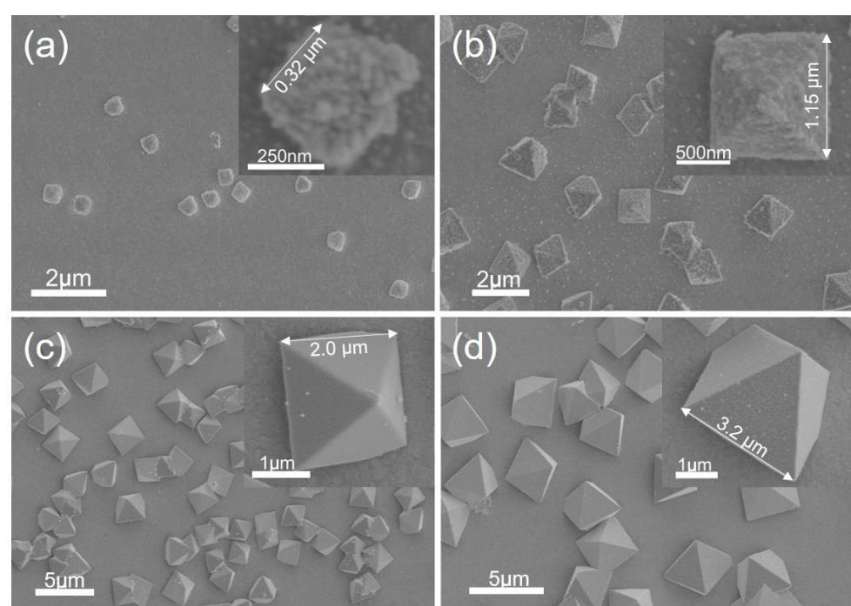

**Figure S5.** SEM images of the  $\text{Ag}_7\text{O}_8\text{NO}_3$  micro-pyramids' morphology evolution under the same electrodeposition voltage (3 V), while the electrodeposition time was increased from 1 s to 300 s: (a) 1 s; (b) 60 s; (c) 180 s; (d) 300 s. The insets are magnified images.

#### S4. Fabrication of nanoporous Ag-decorated $\text{Ag}_7\text{O}_8\text{NO}_3$ micro-pyramids

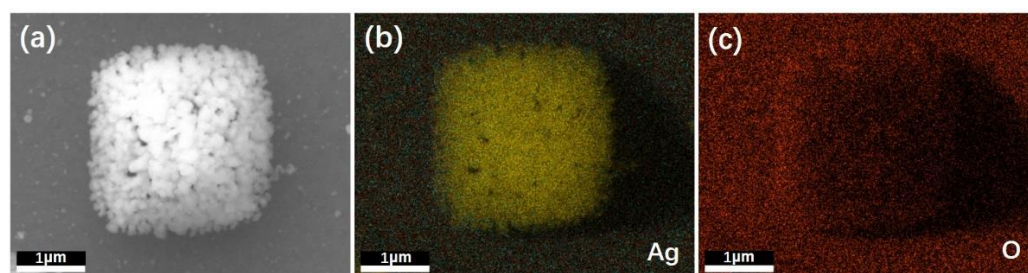

**Figure S6.** Energy-dispersive X-ray (EDX) mapping images of nanoporous Ag-decorated  $\text{Ag}_7\text{O}_8\text{NO}_3$  micro-pyramids: (a) bright-field image; (b) Ag element mapping; (c) O element mapping.

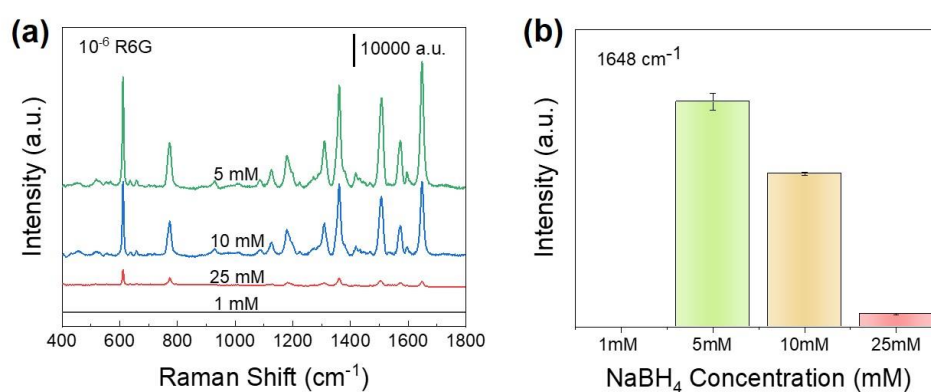

**Figure S7.** (a) SERS signals of R6G ( $10^{-6}$  M) collected from nanoporous Ag-decorated  $\text{Ag}_7\text{O}_8\text{NO}_3$  micro-pyramids reduced by using  $\text{NaBH}_4$  solution with different concentrations. (b) The peak intensity of  $1648 \text{ cm}^{-1}$  detected on the nanoporous Ag-decorated  $\text{Ag}_7\text{O}_8\text{NO}_3$  micro-pyramids corresponding to (a).

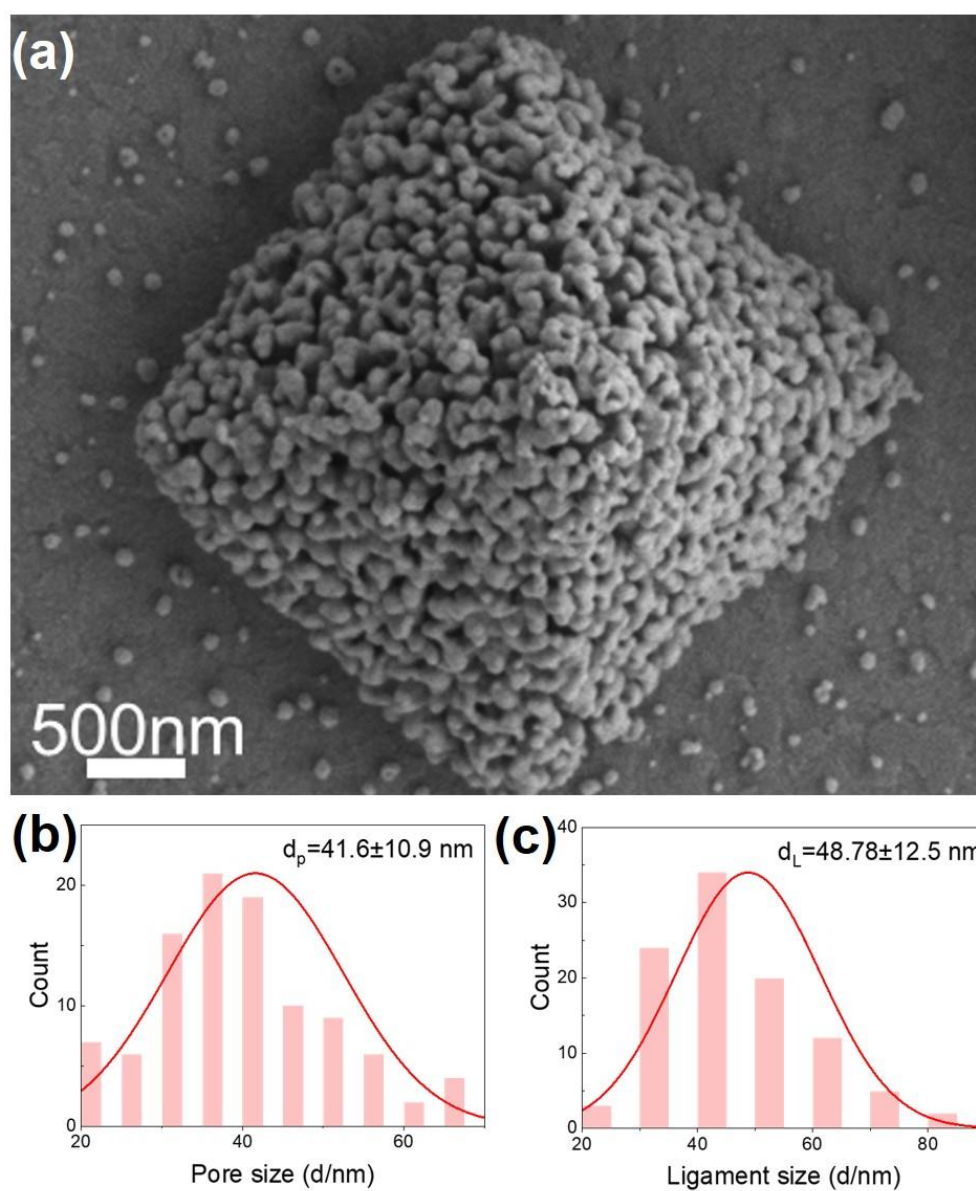

**Figure S8.** (a) Morphology of nanoporous Ag-decorated  $\text{Ag}_7\text{O}_8\text{NO}_3$  micro-pyramids, which was fabricated by reducing  $\text{Ag}_7\text{O}_8\text{NO}_3$  in a 0.005 M  $\text{NaBH}_4$  solution. (b) and (c) shows the pore/ligament size distribution within the nanoporous Ag-decorated  $\text{Ag}_7\text{O}_8\text{NO}_3$  micro-pyramids obtained by measuring 100 nanopores.

## S5. SERS performance

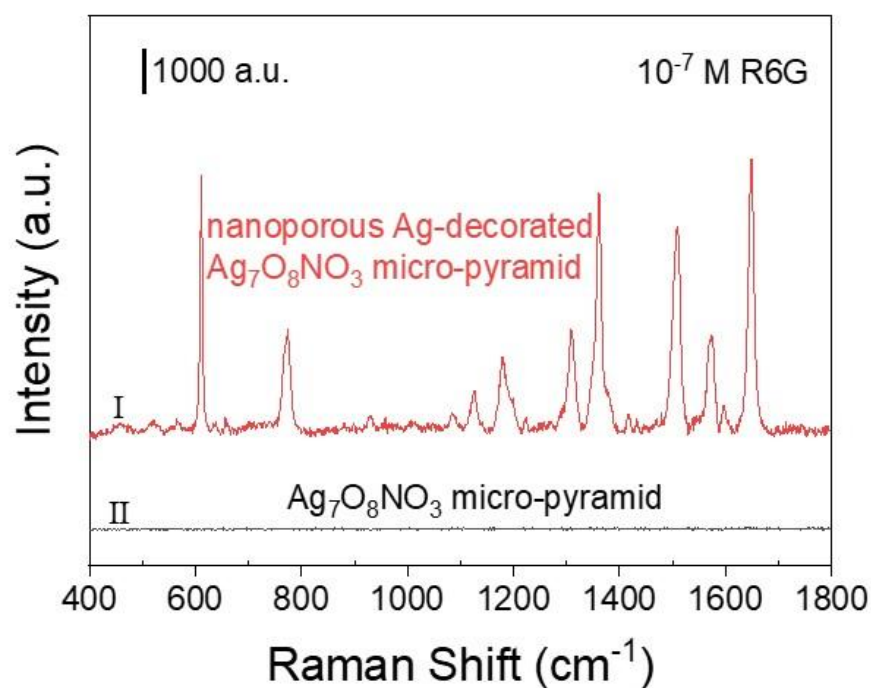

**Figure S9.** (Curve I ) SERS spectrum of  $10^{-7}$  M R6G absorbed on the nanoporous Ag-decorated  $\text{Ag}_7\text{O}_8\text{NO}_3$  micro-pyramids, and (curve II ) SERS spectrum of  $10^{-7}$  M R6G absorbed on the  $\text{Ag}_7\text{O}_8\text{NO}_3$  micro-pyramids. The spectra were acquired with acquisition time of 10 s.

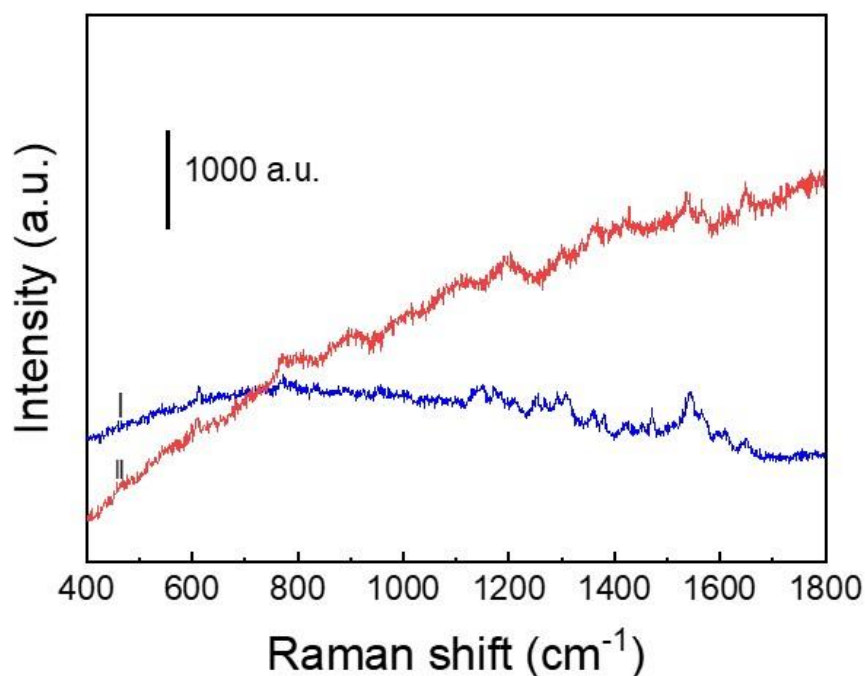

**Figure S10.** (Curve I ) SERS spectrum of  $10^{-11}$  M R6G absorbed on the nanoporous Ag-decorated  $\text{Ag}_7\text{O}_8\text{NO}_3$  micro-pyramids, and (curve II ) the normal Raman spectrum of R6G polyvinyl chloride film. The spectra were acquired with acquisition time of 10 s.

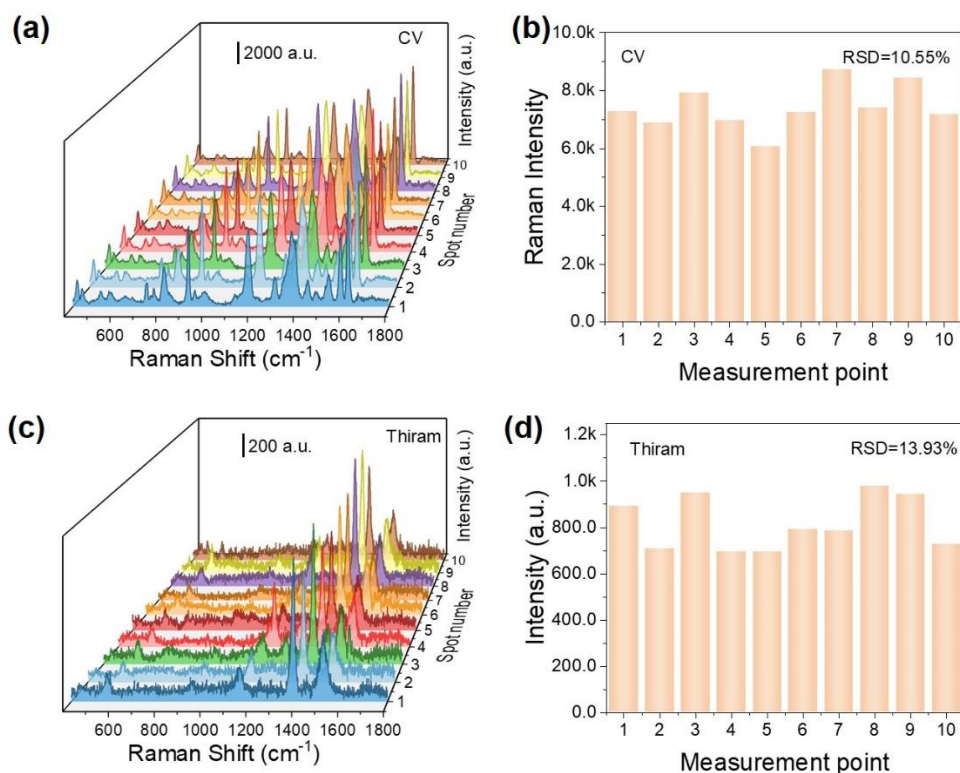

**Figure S11.** (a) and (b) Raman spectra collected from 10 randomly selected sites on nanoporous Ag-decorated Ag<sub>7</sub>O<sub>8</sub>NO<sub>3</sub> micro-pyramids in the detection of 10<sup>-5</sup> M CV and the RSD values of 1618 cm<sup>-1</sup> (CV) peaks, respectively. (c) and (d) Raman spectra collected from 10 randomly selected sites on nanoporous Ag-decorated Ag<sub>7</sub>O<sub>8</sub>NO<sub>3</sub> micro-pyramids in the detection of 10<sup>-5</sup> M thiram and the RSD values of 1384 cm<sup>-1</sup> (thiram) peaks, respectively.

## S6. Comparison of LODs between various SERS substrates

**Table S1.**

| SERS substrate                                                                        | LOD (R6G)                  | Ref.      |
|---------------------------------------------------------------------------------------|----------------------------|-----------|
| nanoporous Ag-decorated Ag <sub>7</sub> O <sub>8</sub> NO <sub>3</sub> micro-pyramids | 10 <sup>-15</sup> M        | This work |
| PA-Ag@C film                                                                          | 10 <sup>-10</sup> M        | [1]       |
| nano-Ag/Au@Au film                                                                    | 1 × 10 <sup>-13</sup> M    | [2]       |
| GO/Au@Ag NBs membranes                                                                | 1.12 × 10 <sup>-10</sup> M | [3]       |
| ZnO/Ag Core-Satellite Nanostructures                                                  | 1 × 10 <sup>-13</sup> M    | [4]       |
| Ag NRs/O-g-C <sub>3</sub> N <sub>4</sub> substrate                                    | 8.2 × 10 <sup>-10</sup> M  | [5]       |
| Ag@Fe <sub>2</sub> O <sub>3</sub> hybrid materials                                    | 9.3 × 10 <sup>-10</sup> M  | [6]       |
| ball-like Ag nanorod aggregates                                                       | 5 × 10 <sup>-9</sup> M     | [7]       |
| flower-like Ag@CuO Substrate                                                          | 2.6 × 10 <sup>-8</sup> M   | [8]       |

## References

- Li, A.; Xin, X.; Zhang, T.; Xu, T.; Li, L.; Liu, C.; Li, W.; Li, J.; Li, Y.; Lu, R. Facile Synthesis of Two-Dimensional PA-Ag@C Film for Highly Sensitive SERS Detection. *Surf. Interface Anal.* *n/a*, doi:10.1002/sia.7161.
- Wen, P.; Yang, F.; Ge, C.; Li, S.; Xu, Y.; Chen, L. Self-Assembled Nano-Ag/Au@Au Film Composite SERS Substrates Show High Uniformity and High Enhancement Factor for Creatinine Detection. *Nanotechnology* **2021**, *32*, 395502, doi:10.1088/1361-6528/ac0ddd.

3. Kong, L.; Chen, J.; Huang, M. GO/Au@Ag Nanobones Decorated Membrane for Simultaneous Enrichment and on-Site SERS Detection of Colorants in Beverages. *Sens. Actuators B Chem.* **2021**, *344*, 130163, doi:10.1016/j.snb.2021.130163.
4. Sun, Q.; Xu, Y.; Gao, Z.; Zhou, H.; Zhang, Q.; Xu, R.; Zhang, C.; Yao, H.; Liu, M. High-Performance Surface-Enhanced Raman Scattering Substrates Based on the ZnO/Ag Core-Satellite Nanostructures. *Nanomaterials* **2022**, *12*, 1286, doi:10.3390/nano12081286.
5. Qu, L.-L.; Geng, Z.-Q.; Wang, W.; Yang, K.-C.; Wang, W.-P.; Han, C.-Q.; Yang, G.-H.; Vajtai, R.; Li, D.-W.; Ajayan, P.M. Recyclable Three-Dimensional Ag Nanorod Arrays Decorated with O-g-C<sub>3</sub>N<sub>4</sub> for Highly Sensitive SERS Sensing of Organic Pollutants. *J. Hazard. Mater.* **2019**, *379*, 120823, doi:10.1016/j.jhazmat.2019.120823.
6. Xu, D.; Duan, L.; Jia, W.; Yang, G.; Gu, Y. Fabrication of Ag@Fe<sub>2</sub>O<sub>3</sub> Hybrid Materials as Ultrasensitive SERS Substrates for the Detection of Organic Dyes and Bilirubin in Human Blood. *Microchem. J.* **2021**, *161*, 105799, doi:10.1016/j.microc.2020.105799.
7. Zhang, W.; Cai, Y.; Qian, R.; Zhao, B.; Zhu, P. Synthesis of Ball-Like Ag Nanorod Aggregates for Surface-Enhanced Raman Scattering and Catalytic Reduction. *Nanomaterials* **2016**, *6*, 99, doi:10.3390/nano6060099.
8. Cheng, M.; Li, C.; Li, W.; Liu, Y. Trace Cd<sup>2+</sup> Ions Detection on the Flower-Like Ag@CuO Substrate. *Nanomaterials* **2020**, *10*, 1664, doi:10.3390/nano10091664.
